# Supplementary material
Source: publisher figshare collection journal article supplement (https://sage.figshare.com/ndownloader/files/31074085)
Supplement: Supplementary file 1 [file 31074085]

*S1. The correlations of special education activities to parent education and children's development*

| Variable, n (%)         | <i>Never</i> | <i>Some</i> | <i>Almost all/all</i> | <i>Total</i> | <i>p</i>     |
|-------------------------|--------------|-------------|-----------------------|--------------|--------------|
| <i>Development</i>      |              |             |                       |              |              |
| <i>No regression</i>    | 16 (16.8)    | 47 (49.5)   | 32 (33.7)             | 95 (81.9)    | <b>0.02*</b> |
| <i>Regression</i>       | 4 (19)       | 16 (76.2)   | 1 (4.8)               | 21 (18.1)    |              |
| <i>Mother education</i> |              |             |                       |              |              |
| <i>&lt;High school</i>  | 6 (31.6)     | 23 (37.1)   | 4 (12.1)              | 33 (28.9)    | <b>0.04*</b> |
| <i>≥High school</i>     | 13 (68.4)    | 39 (62.9)   | 29 (87.9)             | 81 (71.1)    |              |
| <i>Father education</i> |              |             |                       |              |              |
| <i>&lt;High school</i>  | 4 (21.1)     | 23 (37.1)   | 5 (15.2)              | 32 (28.1)    | <b>0.06</b>  |
| <i>≥High school</i>     | 15 (78.9)    | 39 (62.9)   | 28 (84.8)             | 82 (71.9)    |              |

• \*  $p < 0.05$  ; \*\*  $p < 0.01$

• The phi correlation coefficient was used for correlations.
